# Supplementary material for: Molecular Genetic Analysis of Ukrainian Families with Congenital Cataracts
Source: MDPI journal article supplement (doi:10.3390/children10010051), 2022-12-26
Supplement: s1 [file s1]

Table S1. List of Primers used in this study.

| Name                                         | Sequence                                           |
|----------------------------------------------|----------------------------------------------------|
| <i>HSF4</i><br>c.341T>A<br>p.(Leu114Gln)     | 5'AgACGGTTTTTCGGAAGGTG<br>TCGCCCATAAGTCTAGATGGA3'  |
| <i>CRYGA</i><br>c.53A>T<br>p.(Asn18Ile)      | 5'TCTGTGGTGTGTGGGGATG<br>ATTCGGGGTACTTGCCTC3'      |
| <i>GJA3</i><br>c.82G>A<br>p.(Val28Met)       | 5'CCATCCCAGTACCATCCAG<br>GCGTGGACACGAAGATGAT3'     |
| <i>CRYGC</i><br>c.83C>T p.(Pro28Leu)         | 5'GCCTGTTAGGAGCAAATAATGT<br>CCATCCATTGCTGGTATTCG3' |
| <i>PAX6</i><br>c.443_444insA<br>p.(Met148fs) | 5'GGTTGTGGGTGAGCTGAGAT<br>AAGCCCTGAGAGGAAATGGT3'   |
